# Supplementary material for: Transforming Microbial Genotyping: A Robotic Pipeline for Genotyping Bacterial Strains
Source: PubMed Central journal article supplement (PMC3483277; doi:10.1371/journal.pone.0048022), 2012-10-29
Supplement: pone.0048022.s001.pdf [file pone.0048022.s001.pdf]

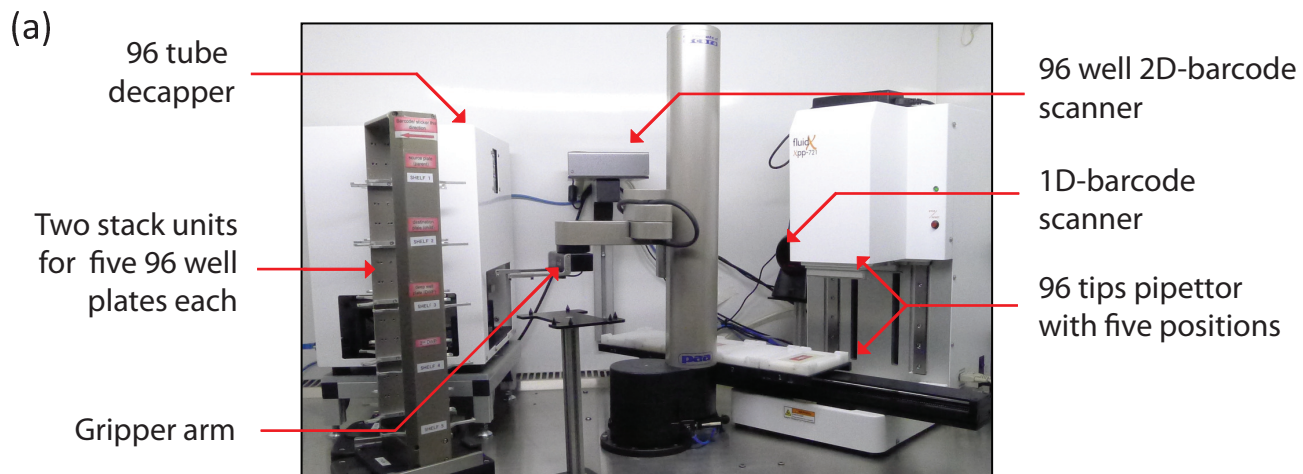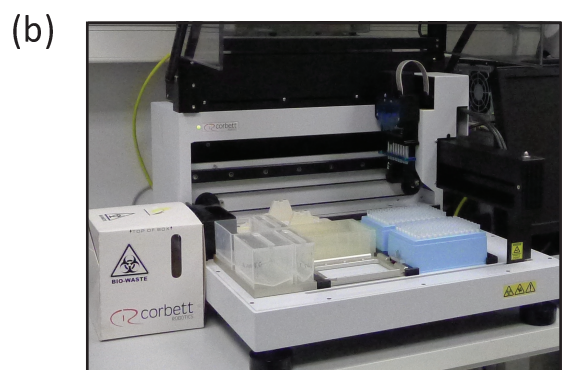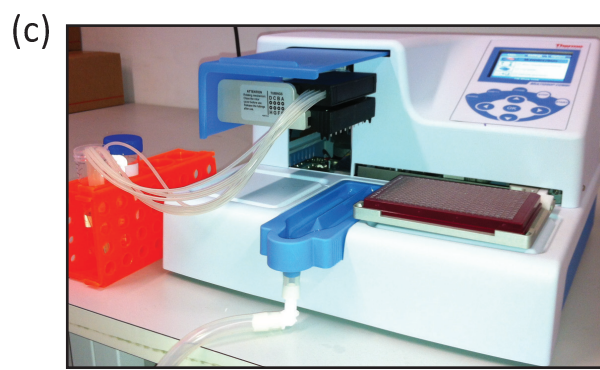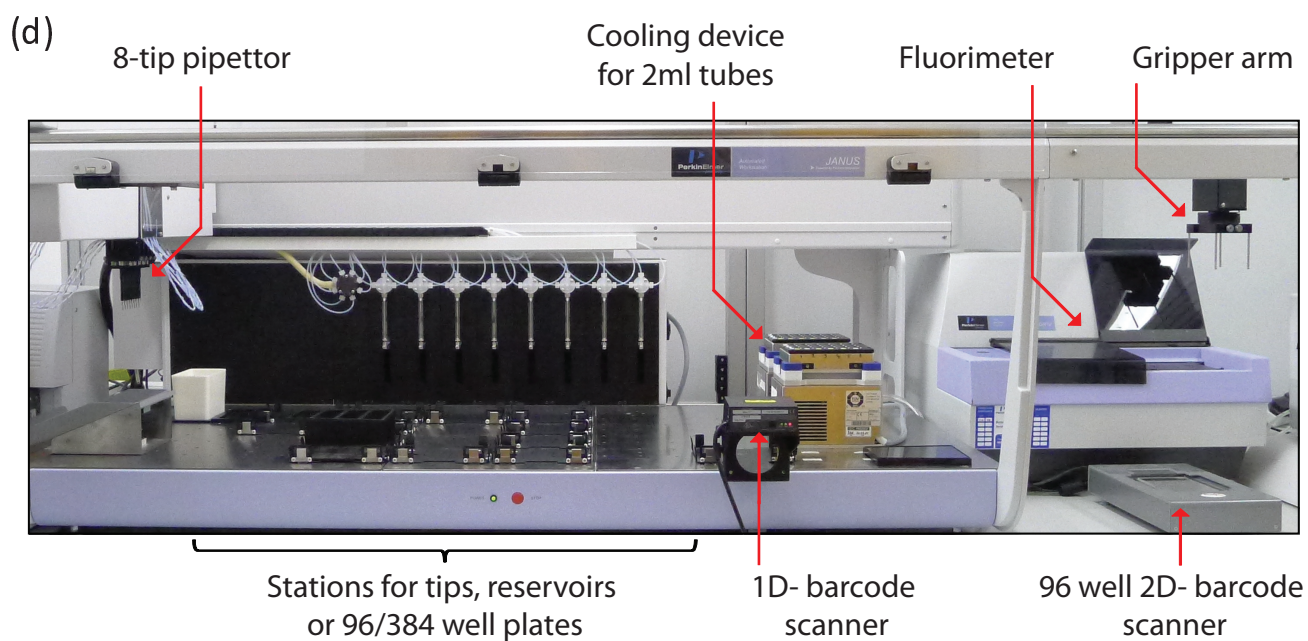

**Supplementary Figure S1.** Components of LHS1 (a), LHS2 (b), LHS3 (c), and LHS4 (d).
